# Supplementary material
Source: publisher figshare collection journal article supplement (https://sage.figshare.com/ndownloader/files/18615830)
Supplement: Supplementary file 1 [file 18615830]

**Appendix Table A1: Extraction form section headings**

| Company submission OS/PFS |                                                                                                                                                                                                                                                                                                                                                                                                                                                                                                                                                                                                                                                                                                                                                                                                                                                                                                                                                                                                                                                                                                                                                                                                                                                                                                                                                                                                                                                                                                                                                                                                                                                                                    |
|---------------------------|------------------------------------------------------------------------------------------------------------------------------------------------------------------------------------------------------------------------------------------------------------------------------------------------------------------------------------------------------------------------------------------------------------------------------------------------------------------------------------------------------------------------------------------------------------------------------------------------------------------------------------------------------------------------------------------------------------------------------------------------------------------------------------------------------------------------------------------------------------------------------------------------------------------------------------------------------------------------------------------------------------------------------------------------------------------------------------------------------------------------------------------------------------------------------------------------------------------------------------------------------------------------------------------------------------------------------------------------------------------------------------------------------------------------------------------------------------------------------------------------------------------------------------------------------------------------------------------------------------------------------------------------------------------------------------|
|                           | <ul style="list-style-type: none"> <li>• Was an assessment made of the empirical hazard(s) based on the observed data and expert clinical input, including the log-cumulative hazard/quantile-quantile/other plots? [yes/no, free-text]</li> <li>• What distributions and/or statistical models were fitted to the observed data? [free-text]</li> <li>• Was an assessment made of the proportional hazards assumption? [yes/no]</li> <li>• How was the relative treatment effect modelled? [free-text]</li> <li>• Was an assessment made of the absolute goodness-of-fit i.e. interval validity? [yes/no, free-text]</li> <li>• Was an assessment made of the relative goodness-of-fit i.e. internal validity? [yes/no, free-text]</li> <li>• Was an assessment made of the external validity (i.e. clinical plausibility) of the extrapolations? [yes/no]</li> <li>• If Yes, then what was this based on e.g. expert clinical opinion, external data? [free-text]</li> <li>• Was any external evidence used in the generation of the survivor functions? [free-text]</li> <li>• Was uncertainty accounted for during the observed and unobserved data periods? [yes/no, free-text]</li> <li>• Were summary statistics used to estimate survival for one (e.g. mean, median, proportion or a given time) or both arms (e.g. hazard ratio)? [yes/no, free-text]</li> <li>• What other considerations are relevant in the assessment (e.g. treatment switching)? [yes/no, free-text]</li> <li>• Did the modelling follow the recommendations of the DSU TSD? [yes/no]</li> <li>• If no, then in what ways did the modelling differ from the recommendations? [free-text]</li> </ul> |
| ERG Report OS/PFS         |                                                                                                                                                                                                                                                                                                                                                                                                                                                                                                                                                                                                                                                                                                                                                                                                                                                                                                                                                                                                                                                                                                                                                                                                                                                                                                                                                                                                                                                                                                                                                                                                                                                                                    |
|                           | <ul style="list-style-type: none"> <li>• What criticisms did the ERG make of the company submission? [free-text]</li> <li>• What alternative approaches did they suggest and/or provide? [free-text]</li> </ul>                                                                                                                                                                                                                                                                                                                                                                                                                                                                                                                                                                                                                                                                                                                                                                                                                                                                                                                                                                                                                                                                                                                                                                                                                                                                                                                                                                                                                                                                    |
| FAD                       |                                                                                                                                                                                                                                                                                                                                                                                                                                                                                                                                                                                                                                                                                                                                                                                                                                                                                                                                                                                                                                                                                                                                                                                                                                                                                                                                                                                                                                                                                                                                                                                                                                                                                    |
|                           | <ul style="list-style-type: none"> <li>• TA recommendation [free-text]</li> <li>• What issues relating to the extrapolation and modelling of the OS/PFS data did the Appraisal Committee mention in the FAD that affected the final decision? [free-text]</li> <li>• Which distribution and/or statistical model contributed to the Appraisal Committee's most plausible estimate of mean life years, mean QALYs and ICER? [free-text]</li> </ul>                                                                                                                                                                                                                                                                                                                                                                                                                                                                                                                                                                                                                                                                                                                                                                                                                                                                                                                                                                                                                                                                                                                                                                                                                                  |
